# Supplementary material for: Identification of Malassezia globosa as a Gastric Fungus Associated with PD-L1 Expression and Overall Survival of Patients with Gastric Cancer
Source: Hindawi journal article supplement (doi:10.1155/2022/2430759), 2022-11-09

## Supplementary Figure.1 Figure Legend

Alpha-diversity of the gastric fungal microbiota in the different PD-L1 expression groups.

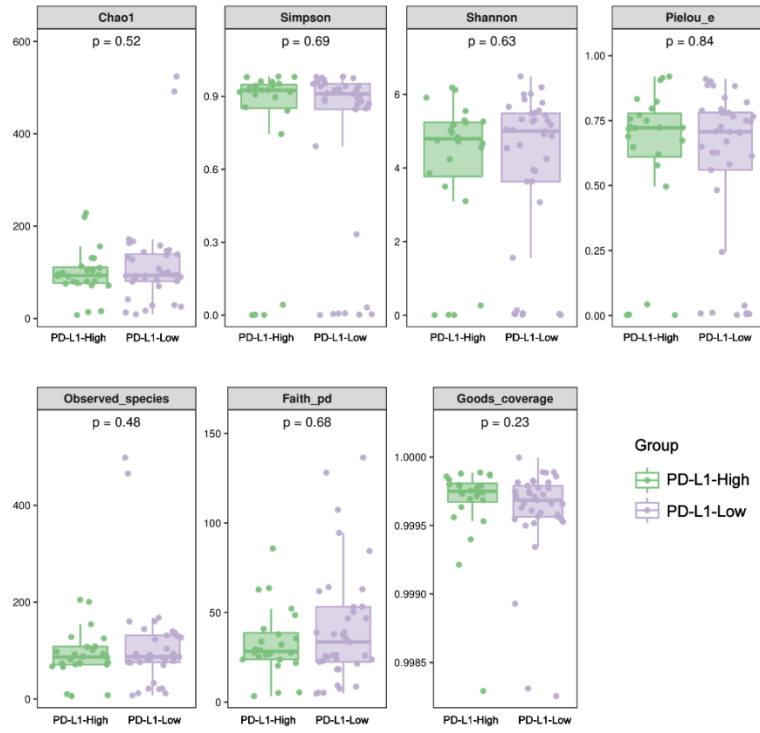

Supplement: f1 [file 2430759.f1.pdf]
