# Supplementary material for: Identification of Malassezia globosa as a Gastric Fungus Associated with PD-L1 Expression and Overall Survival of Patients with Gastric Cancer
Source: Hindawi journal article supplement (doi:10.1155/2022/2430759), 2022-11-09

## Supplementary Figure.2 Figure Legend

(A-C) Survival analysis of *Malassezia globosa*, *Malassezia restricta*, *Malassezia furfur* in GC patients

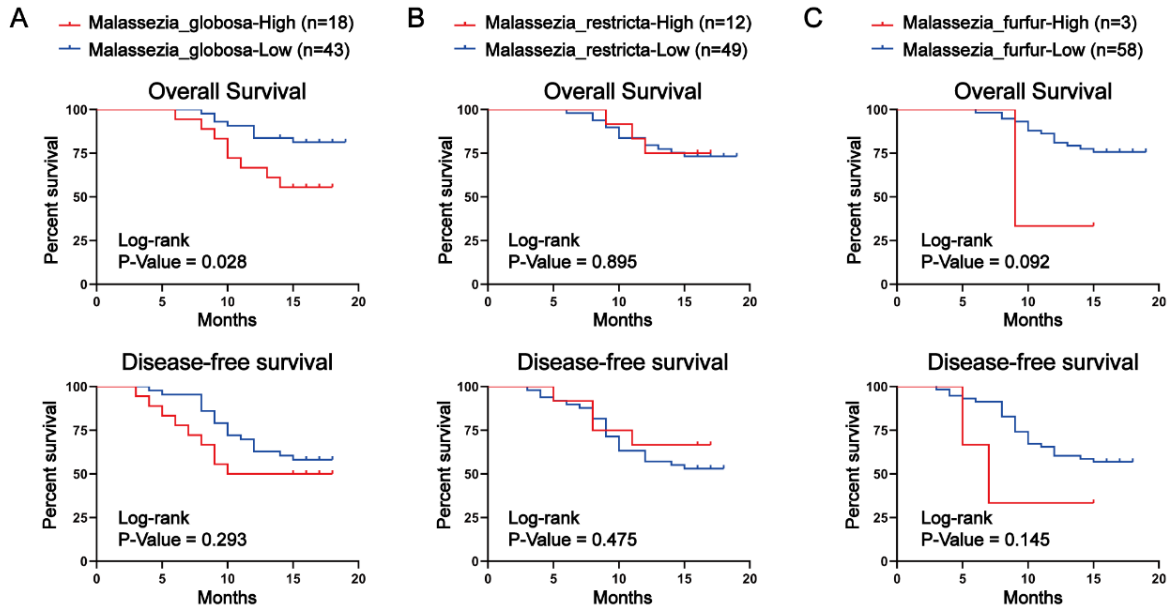

Supplement: f2 [file 2430759.f2.pdf]
