# Supplementary material for: Identification of Malassezia globosa as a Gastric Fungus Associated with PD-L1 Expression and Overall Survival of Patients with Gastric Cancer
Source: Hindawi journal article supplement (doi:10.1155/2022/2430759), 2022-11-09
Supplement: f3 [file 2430759.f3.pdf]

**Supplementary.Table.1** Clinical characteristics of 61 GC patients who divided into the two groups according to the IHC density of PD-L1 expression in tumor tissues.

| Characteristics                      |                                         | PD-L1 expression (CPS Index) |            | P-value |
|--------------------------------------|-----------------------------------------|------------------------------|------------|---------|
|                                      |                                         | High (n=24)                  | Low (n=37) |         |
| Age                                  | ≥ 65                                    | 11 (45.8%)                   | 12 (32.4%) | 0.291   |
|                                      | < 65                                    | 13 (54.2%)                   | 25 (67.6%) |         |
| Gender                               | Male                                    | 19 (79.2%)                   | 24 (64.9%) | 0.232   |
|                                      | Female                                  | 5 (20.8%)                    | 13 (35.1%) |         |
| Body Mass Index (kg/m <sup>2</sup> ) | < 24                                    | 16 (66.7%)                   | 28 (75.7%) | 0.443   |
|                                      | ≥ 24                                    | 8 (33.3%)                    | 9 (24.3%)  |         |
| Tumor Location                       | Upper                                   | 10 (41.7%)                   | 9 (24.3%)  | 0.153   |
|                                      | Middle/Lower                            | 14 (58.3%)                   | 28 (75.7%) |         |
| Tumor Differentiation                | High/Moderate                           | 9 (37.5%)                    | 14 (37.8%) | 0.979   |
|                                      | Poor                                    | 15 (62.5%)                   | 23 (62.2%) |         |
| Lauren Classification                | Diffuse                                 | 13 (54.2%)                   | 23 (62.2%) | 0.755   |
|                                      | Intestinal                              | 7 (29.1%)                    | 10 (27.0%) |         |
|                                      | Mix                                     | 4 (16.7%)                    | 4 (10.8%)  |         |
| Tumor Size (Max, cm)                 | ≥ 4.6                                   | 15 (62.5%)                   | 16 (43.2%) | 0.142   |
|                                      | < 4.6                                   | 9 (37.5%)                    | 21 (56.8%) |         |
| pTNM Stage                           | I                                       | 2 (8.3%)                     | 4 (10.8%)  | 0.278   |
|                                      | II                                      | 2 (8.3%)                     | 7 (18.9%)  |         |
|                                      | III                                     | 17 (70.9%)                   | 17 (46.0%) |         |
|                                      | IV                                      | 3 (12.5%)                    | 9 (24.3%)  |         |
| Lymphatic Vessel Invasive (D2-40)    | Positive                                | 11 (45.8%)                   | 9 (24.3%)  | 0.080   |
|                                      | Negative                                | 13 (54.2%)                   | 28 (75.7%) |         |
| Vascular Invasive (CD31)             | Positive                                | 9 (37.5%)                    | 6 (16.2%)  | 0.059   |
|                                      | Negative                                | 15 (62.5%)                   | 31 (83.9%) |         |
| Nerve Invasive (S-100)               | Positive                                | 19 (79.2%)                   | 27 (73.0%) | 0.583   |
|                                      | Negative                                | 5 (20.8%)                    | 10 (27.0%) |         |
| HER2 Status                          | 0/1+/2+                                 | 20 (83.3%)                   | 33 (89.2%) | 0.508   |
|                                      | 3+                                      | 4 (16.7%)                    | 4 (10.8%)  |         |
| Postoperative Treatment              | None                                    | 2 (8.3%)                     | 4 (10.8%)  | 0.299   |
|                                      | Chemotherapy                            | 14 (58.3%)                   | 27 (73.0%) |         |
|                                      | Chemotherapy+Anti-PD-1<br>Immunotherapy | 8 (33.3%)                    | 6 (16.2%)  |         |

\*P<0.05 was considered significant. Chi-square test was used in this table.
