# Supplementary material for: Identification of Malassezia globosa as a Gastric Fungus Associated with PD-L1 Expression and Overall Survival of Patients with Gastric Cancer
Source: Hindawi journal article supplement (doi:10.1155/2022/2430759), 2022-11-09
Supplement: f4 [file 2430759.f4.pdf]

**Supplementary Table.2** The fungal species of *Malassezia* at the species level.

| <i>Malassezia</i>             | AUC, 95%CI           | Cutoff value | OR, 95%CI         | P-value |
|-------------------------------|----------------------|--------------|-------------------|---------|
| <i>Malassezia_globosa</i>     | 0.614 (0.465, 0.762) | 140          | 3.63 (1.17-11.96) | 0.028   |
| <i>Malassezia_restricta</i>   | 0.624 (0.469, 0.778) | 1238         | 6.80 (1.75-34.06) | 0.009   |
| <i>Malassezia_furfur</i>      | 0.528 (0.466, 0.591) | 3            | 3.27 (0.30-72.89) | 0.345   |
| <i>Malassezia_arunaloeki</i>  | 0.508 (0.459, 0.557) | 591          | -                 | -       |
| <i>Malassezia_dermatis</i>    | -                    | -            | -                 | -       |
| <i>Malassezia_japonica</i>    | -                    | -            | -                 | -       |
| <i>Malassezia_sympodialis</i> | -                    | -            | -                 | -       |
| <i>Malassezia_yamatoensis</i> | -                    | -            | -                 | -       |
