# Supplementary material for: Identification of Malassezia globosa as a Gastric Fungus Associated with PD-L1 Expression and Overall Survival of Patients with Gastric Cancer
Source: Hindawi journal article supplement (doi:10.1155/2022/2430759), 2022-11-09
Supplement: f5 [file 2430759.f5.pdf]

**Supplementary Table.3** Clinicopathological characteristics of *Malassezia globosa* in GC patients.

| Characteristics                      |                        | <i>Malassezia globosa</i> |             | P-value       |
|--------------------------------------|------------------------|---------------------------|-------------|---------------|
|                                      |                        | Low (n=43)                | High (n=18) |               |
| Age                                  | ≥ 65                   | 13 (30.2%)                | 10 (55.6%)  | 0.063         |
|                                      | < 65                   | 30 (69.8%)                | 8 (44.4%)   |               |
| Gender                               | Male                   | 31 (72.1%)                | 12 (66.7%)  | 0.672         |
|                                      | Female                 | 12 (27.9%)                | 6 (33.3%)   |               |
| Body Mass Index (kg/m <sup>2</sup> ) | < 24                   | 31 (72.1%)                | 13 (72.2%)  | 0.992         |
|                                      | ≥ 24                   | 12 (27.9%)                | 5 (27.8%)   |               |
| Tumor Location                       | Upper                  | 11 (25.6%)                | 8 (44.4%)   | 0.147         |
|                                      | Middle/Lower           | 32 (74.4%)                | 10 (55.6%)  |               |
| Tumor Differentiation                | High/Moderate          | 19 (44.2%)                | 4 (22.2%)   | 0.106         |
|                                      | Poor                   | 24 (55.8%)                | 14 (77.8%)  |               |
| Lauren Classification                | Diffuse                | 24 (55.8%)                | 12 (66.7%)  | 0.732         |
|                                      | Intestinal             | 13 (30.2%)                | 4 (22.2%)   |               |
|                                      | Mix                    | 6 (14.0%)                 | 2 (11.1%)   |               |
| Tumor Size (Max, cm)                 | ≥ 4.6                  | 18 (41.9%)                | 13 (72.2%)  | <b>0.031*</b> |
|                                      | < 4.6                  | 25 (58.1%)                | 5 (27.8%)   |               |
| pTNM Stage                           | I                      | 4 (9.3%)                  | 2 (11.1%)   | 0.218         |
|                                      | II                     | 9 (20.9%)                 | 0 (0%)      |               |
|                                      | III                    | 22 (51.2%)                | 12 (66.7%)  |               |
|                                      | IV                     | 8 (18.6%)                 | 4 (22.2%)   |               |
|                                      |                        |                           |             |               |
| Lymphatic Vessel Invasive (D2-40)    | Positive               | 12 (27.9%)                | 8 (44.4%)   | 0.210         |
|                                      | Negative               | 31 (72.1%)                | 10 (55.6%)  |               |
| Vascular Invasive (CD31)             | Positive               | 10 (23.3%)                | 5 (27.8%)   | 0.708         |
|                                      | Negative               | 33 (76.7%)                | 13 (72.2%)  |               |
| Nerve Invasive (S-100)               | Positive               | 31 (72.1%)                | 15 (83.3%)  | 0.352         |
|                                      | Negative               | 12 (27.9%)                | 3 (16.7%)   |               |
| HER2 Status                          | 0/1+/2+                | 35 (81.4%)                | 18 (100%)   | 0.050         |
|                                      | 3+                     | 8 (18.6%)                 | 0 (0%)      |               |
| PD-L1 Status                         | CPS≥10                 | 13 (30.2%)                | 11 (61.1%)  | <b>0.024*</b> |
|                                      | CPS<10                 | 30 (69.8%)                | 7 (38.9%)   |               |
| Postoperative Treatment              | None                   | 4 (9.3%)                  | 2 (11.1%)   | 0.801         |
|                                      | Chemotherapy           | 30 (69.8%)                | 11 (61.1%)  |               |
|                                      | Chemotherapy+Anti-PD-1 | 9 (20.9%)                 | 5 (27.8%)   |               |
|                                      | Immunotherapy          |                           |             |               |

\*P<0.05 was considered significant. Chi-square test was used in this table.
