# Supplementary material for: Identification of Malassezia globosa as a Gastric Fungus Associated with PD-L1 Expression and Overall Survival of Patients with Gastric Cancer
Source: Hindawi journal article supplement (doi:10.1155/2022/2430759), 2022-11-09
Supplement: f6 [file 2430759.f6.pdf]

**Supplementary Table 4** Univariate and Multivariable Cox regression analysis for OS.

| Characteristics                                  | Univariate analysis <sup>#</sup> |                   | Multivariate analysis |                   |
|--------------------------------------------------|----------------------------------|-------------------|-----------------------|-------------------|
|                                                  | HR, 95% CI                       | P-value           | HR, 95%CI             | P-value           |
| Age ( $\geq 65$ vs $< 65$ , years)               | 2.311 (0.860-6.206)              | 0.097             | -                     |                   |
| Gender (Male vs Female)                          | 0.621 (0.226-1.710)              | 0.356             | -                     |                   |
| BMI ( $\geq 24$ vs $< 24$ , kg/m <sup>2</sup> )  | 1.327 (0.460-3.823)              | 0.601             | -                     |                   |
| Tumor Max Size ( $\geq 4.6$ vs $< 4.6$ , cm)     | 1.711 (0.622-4.707)              | 0.299             | -                     |                   |
| Tumor Location                                   |                                  |                   |                       |                   |
| Upper                                            | 1 (Ref.)                         |                   |                       |                   |
| Middle                                           | 0.426 (0.088-2.049)              | 0.426             | -                     |                   |
| Lower                                            | 0.631 (0.221-1.801)              | 0.390             | -                     |                   |
| Tumor Differentiation (Poor vs High/Moderate)    | 3.354 (0.729-15.437)             | 0.120             |                       |                   |
| Lauren Classification                            |                                  |                   |                       |                   |
| Intestinal                                       | 1 (Ref.)                         |                   |                       |                   |
| Diffuse                                          | 3.912 (0.887-17.255)             | 0.072             | -                     |                   |
| Mix                                              | -                                | -                 |                       |                   |
| pTNM Stage (IV vs I/II/III)                      | 5.801 (2.157-15.599)             | <b>&lt; 0.001</b> | 6.213 (2.275-16.966)  | <b>&lt; 0.001</b> |
| Lymphatic Vessel Invasive (Positive vs Negative) | 0.943 (0.328-2.716)              | 0.914             | -                     |                   |
| Vascular Invasive (Positive vs Negative)         | 1.925 (0.699-5.300)              | 0.205             | -                     |                   |
| Nerve Invasive (Positive vs Negative)            | 0.974 (0.891-1.066)              | 0.572             | -                     |                   |
| HER2 Status (3+ vs 0/1+/2+)                      | 0.932 (0.212-4.105)              | 0.926             | -                     |                   |
| PD-L1 Status (High vs Low)                       | 1.645 (0.617-4.384)              | 0.320             | -                     |                   |
| <i>Malassezia globosa</i> (High vs Low)          | 2.830 (1.061-7.554)              | <b>0.038</b>      | 3.080 (1.140-8.323)   | <b>0.027</b>      |
| Postoperative Treatment                          |                                  |                   |                       |                   |
| None                                             | -                                | -                 |                       |                   |
| Chemotherapy                                     | 0.491 (0.178-1.351)              | 0.168             | -                     |                   |
| Chemotherapy+Anti-PD-1 Immunotherapy             | 1 (Ref.)                         |                   |                       |                   |

<sup>#</sup>The variables with P<0.05 were included in multivariate analysis

\*P<0.05 was considered significant. HR: Hazard Ratio, CI: Confidence Interval.
